# Supplementary material for: Identification of aneuploidy-related gene signature to predict survival in head and neck squamous cell carcinomas
Source: publisher site journal article supplement (doi:10.18632/aging.205221), 2023-11-20
Supplement: Supplementary file [file aging-v15i22-205221-supplementary-material-SD1.pdf]

SUPPLEMENTARY FIGURE

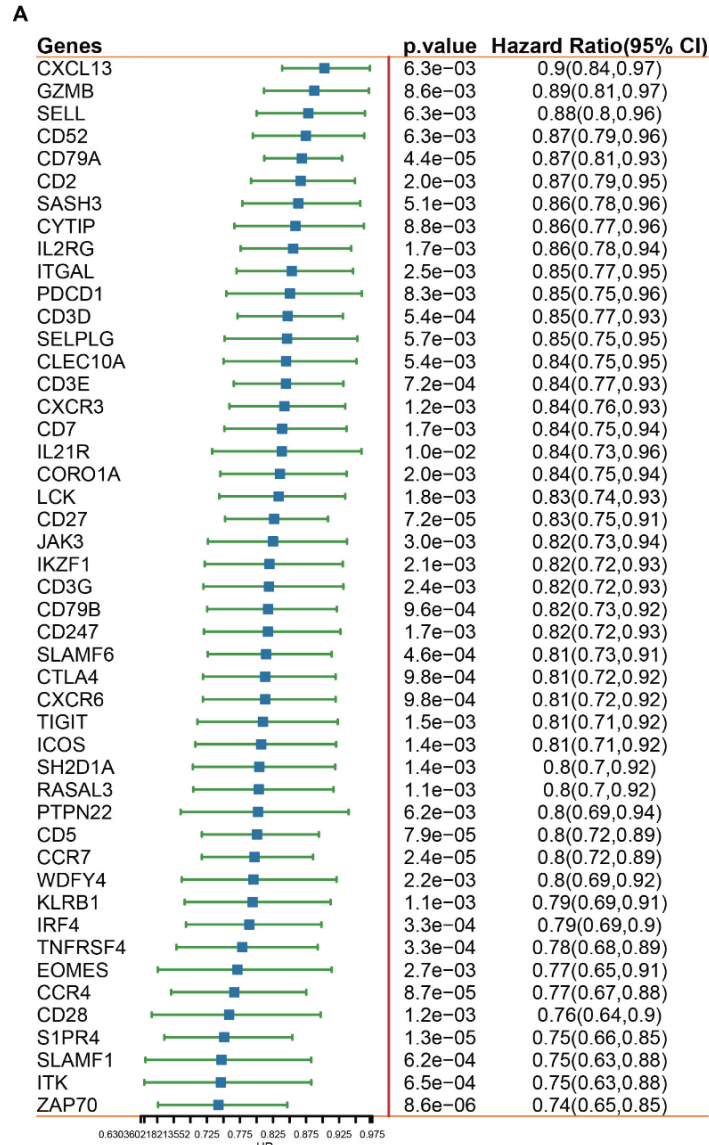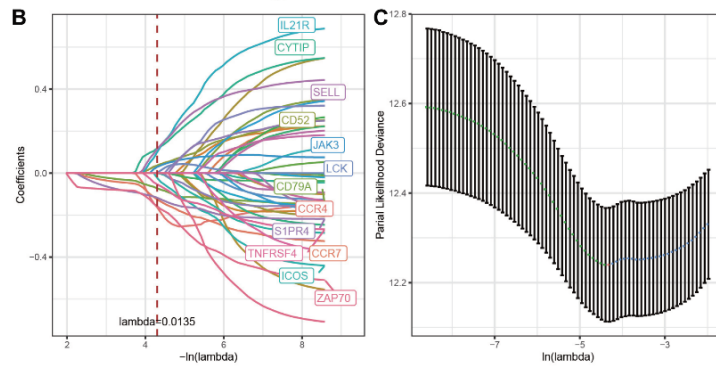

**Supplementary Figure 1. Establishment of a prognostic signature. (A)** Univariate Cox regression analysis of genes correlated with HNSC prognosis. **(B, C)** LASSO analysis for significant genes associated with HNSC prognosis.
